# Supplementary material
Source: MDPI journal article supplement (https://www.mdpi.com/1424-2818/13/6/239)

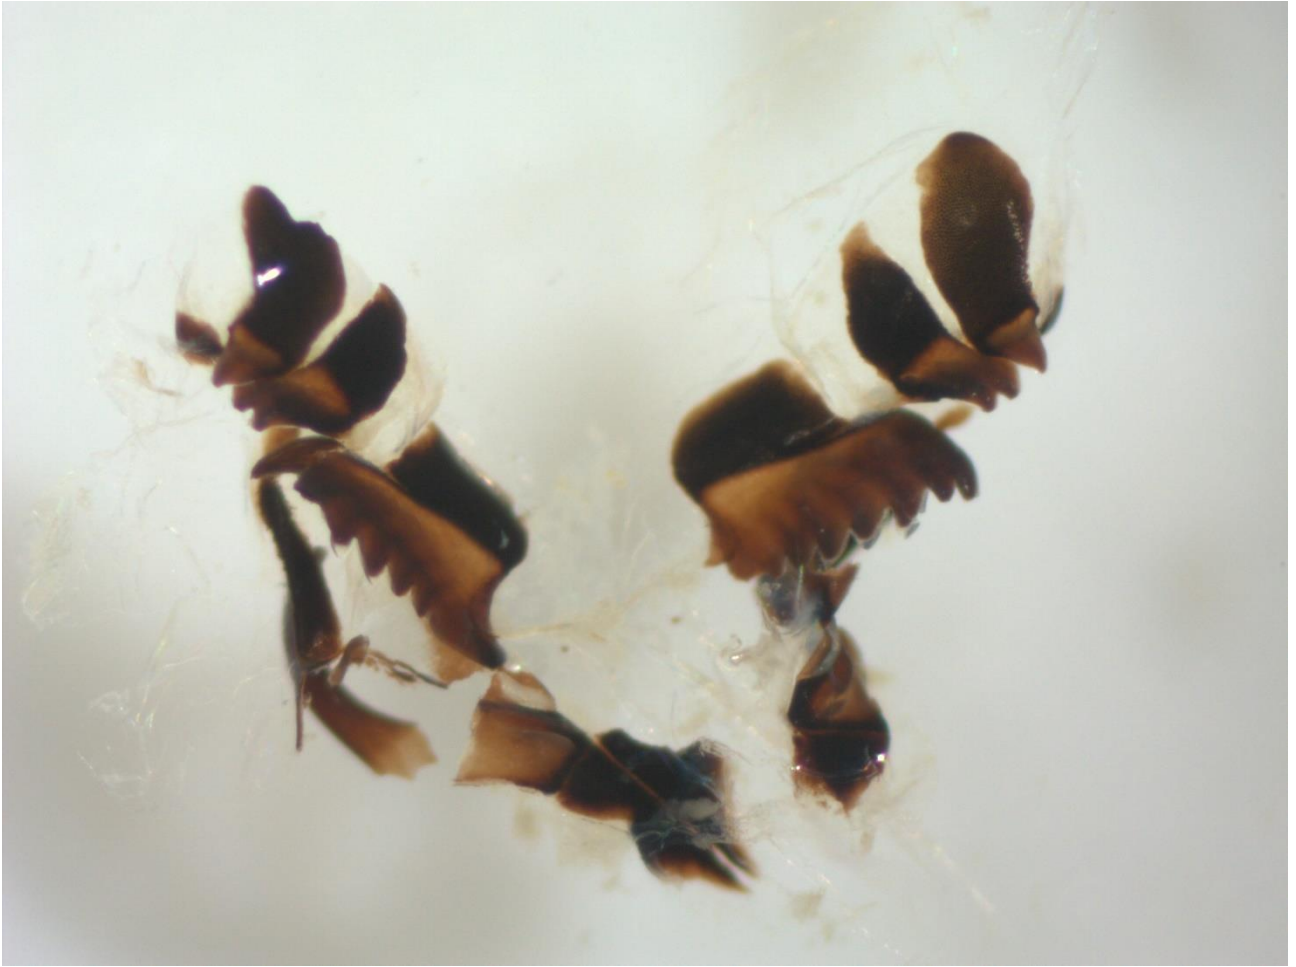

**Figure S1.** Photo of the mandibles of *Lumbrineris coccinea*.

Supplement: s1 [file s1]
